# Supplementary material for: Gate-based quantum computing for protein design
Source: PubMed Central journal article supplement (PMC10124842; doi:10.1371/journal.pcbi.1011033), 2023-04-12
Supplement: pcbi.1011033.s002.pdf [file pcbi.1011033.s002.pdf]

## S2. Explicit results of each system

Answer states of all systems studied in the main paper are provided in Tables S1, S2 and S3.

**TABLE S1.** Answers for all systems studied in the SP model.

| s=2                                                                                                      |                                                                                                                                                                                                                            | s=3                                                                                                                                                                                                                        |                                                                                                                                                                                                                         | s=6,i=3                                                                                                                                                                                                              |                                                                                                                                                                                                                                                                                                                                                                                                                                                                                                                                                                                                                                        |                                                                                                                                                                                                                                                                                                                                                                                                                                                                                                                                                                                                                |
|----------------------------------------------------------------------------------------------------------|----------------------------------------------------------------------------------------------------------------------------------------------------------------------------------------------------------------------------|----------------------------------------------------------------------------------------------------------------------------------------------------------------------------------------------------------------------------|-------------------------------------------------------------------------------------------------------------------------------------------------------------------------------------------------------------------------|----------------------------------------------------------------------------------------------------------------------------------------------------------------------------------------------------------------------|----------------------------------------------------------------------------------------------------------------------------------------------------------------------------------------------------------------------------------------------------------------------------------------------------------------------------------------------------------------------------------------------------------------------------------------------------------------------------------------------------------------------------------------------------------------------------------------------------------------------------------------|----------------------------------------------------------------------------------------------------------------------------------------------------------------------------------------------------------------------------------------------------------------------------------------------------------------------------------------------------------------------------------------------------------------------------------------------------------------------------------------------------------------------------------------------------------------------------------------------------------------|
| $E_{th}=-3$                                                                                              | $E_{th}=-2$                                                                                                                                                                                                                | $E_{th}=-7$                                                                                                                                                                                                                | $E_{th}=-5$                                                                                                                                                                                                             | $E_{th}=-11$                                                                                                                                                                                                         | $E_{th}=-10$                                                                                                                                                                                                                                                                                                                                                                                                                                                                                                                                                                                                                           |                                                                                                                                                                                                                                                                                                                                                                                                                                                                                                                                                                                                                |
| Seq(2 – 1)                                                                                               |                                                                                                                                                                                                                            | Seq(3 – 2 – 1)                                                                                                                                                                                                             |                                                                                                                                                                                                                         | Seq(6 – 5 – 4 – 3 – 2 – 1)                                                                                                                                                                                           |                                                                                                                                                                                                                                                                                                                                                                                                                                                                                                                                                                                                                                        |                                                                                                                                                                                                                                                                                                                                                                                                                                                                                                                                                                                                                |
| Pos-Neg<br>Neg-Pos                                                                                       | H1-H1<br>Pol1-Pol1<br>Pol2-Pol2<br>Pos-Neg<br>Neg-Pos                                                                                                                                                                      | Pos-Pos-Neg<br>Neg-Neg-Pos                                                                                                                                                                                                 | H1-H1-H1<br>Pos-Pos-Neg<br>Neg-Neg-Pos<br>Pol1-Pol1-Pol1<br>Pol2-Pol2-Pol2                                                                                                                                              | Pos-Neg-Pos-Neg-Pos-Neg<br>Pos-Neg-Pos-Neg-Neg-Pos<br>Pos-Neg-Neg-Pos-Pos-Neg<br>Pos-Neg-Neg-Pos-Neg-Pos<br>Neg-Pos-Pos-Neg-Pos-Neg<br>Neg-Pos-Pos-Neg-Neg-Pos<br>Neg-Pos-Neg-Pos-Pos-Neg<br>Neg-Pos-Neg-Pos-Pos-Neg | Pol1-Pol1-Pos-Neg-Pos-Neg<br>Pol1-Pol1-Pos-Neg-Neg-Pos<br>Pol1-Pol1-Neg-Pos-Pos-Neg<br>Pol1-Pol1-Neg-Pos-Neg-Pos<br>Pol2-Pol2-Pos-Neg-Pos-Neg<br>Pol2-Pol2-Pos-Neg-Neg-Pos<br>Pol2-Pol2-Neg-Pos-Pos-Neg<br>Pol2-Pol2-Neg-Pos-Neg-Pos<br>Pos-Neg-H1-H1-Pos-Neg<br>Pos-Neg-H1-H1-Neg-Pos<br>Pos-Neg-Pol1-Pol1-Pos-Neg<br>Pos-Neg-Pol1-Pol1-Neg-Pos<br>Pos-Neg-Pol2-Pol2-Pos-Neg<br>Pos-Neg-Pol2-Pol2-Neg-Pos<br>Pos-Neg-Pos-Neg-H1-H1<br>Pos-Neg-Pos-Neg-Pol1-Pol1<br>Pos-Neg-Pos-Neg-Pol2-Pol2<br>Pos-Neg-Pos-Neg-Pos-Neg<br>Pos-Neg-Pos-Neg-Neg-Pos<br>Pos-Neg-Neg-Pos-H1-H1<br>Pos-Neg-Neg-Pos-Pol1-Pol1<br>Pos-Neg-Neg-Pos-Pol2-Pol2 | Pos-Neg-Neg-Pos-Pos-Neg<br>Pos-Neg-Neg-Pos-Neg-Pos<br>Neg-Pos-H1-H1-Pos-Neg<br>Neg-Pos-H1-H1-Neg-Pos<br>Neg-Pos-Pol1-Pol1-Pos-Neg<br>Neg-Pos-Pol1-Pol1-Neg-Pos<br>Neg-Pos-Pol2-Pol2-Pos-Neg<br>Neg-Pos-Pol2-Pol2-Neg-Pos<br>Neg-Pos-Pos-Neg-H1-H1<br>Neg-Pos-Pos-Neg-Pol1-Pol1<br>Neg-Pos-Pos-Neg-Pol2-Pol2<br>Neg-Pos-Pos-Neg-Pos-Neg<br>Neg-Pos-Pos-Neg-Neg-Pos<br>Neg-Pos-Neg-Pos-H1-H1<br>Neg-Pos-Neg-Pos-Pol1-Pol1<br>Neg-Pos-Neg-Pos-Pol2-Pol2<br>Neg-Pos-Neg-Pos-Pos-Neg<br>Neg-Pos-Neg-Pos-Neg-Pos<br>H1-H1-Pos-Neg-Pos-Neg<br>H1-H1-Pos-Neg-Neg-Pos<br>H1-H1-Neg-Pos-Pos-Neg<br>H1-H1-Neg-Pos-Neg-Pos |
| s=6,i=4                                                                                                  |                                                                                                                                                                                                                            |                                                                                                                                                                                                                            | s=6,i=5                                                                                                                                                                                                                 |                                                                                                                                                                                                                      |                                                                                                                                                                                                                                                                                                                                                                                                                                                                                                                                                                                                                                        |                                                                                                                                                                                                                                                                                                                                                                                                                                                                                                                                                                                                                |
| $E_{th}=-15$                                                                                             |                                                                                                                                                                                                                            | $E_{th}=-13$                                                                                                                                                                                                               |                                                                                                                                                                                                                         | $E_{th}=-19$                                                                                                                                                                                                         | $E_{th}=-16$                                                                                                                                                                                                                                                                                                                                                                                                                                                                                                                                                                                                                           |                                                                                                                                                                                                                                                                                                                                                                                                                                                                                                                                                                                                                |
| Seq(6 – 5 – 4 – 3 – 2 – 1)                                                                               |                                                                                                                                                                                                                            |                                                                                                                                                                                                                            | Seq(6 – 5 – 4 – 3 – 2 – 1)                                                                                                                                                                                              |                                                                                                                                                                                                                      |                                                                                                                                                                                                                                                                                                                                                                                                                                                                                                                                                                                                                                        |                                                                                                                                                                                                                                                                                                                                                                                                                                                                                                                                                                                                                |
| Pos-Pos-Neg-Pos-Pos-Neg<br>Pos-Pos-Neg-Neg-Neg-Pos<br>Neg-Neg-Pos-Pos-Pos-Neg<br>Neg-Neg-Pos-Neg-Neg-Pos | H1-H1-H1-Pos-Pos-Neg<br>Pol1-Pol1-Pol1-Pos-Pos-Neg<br>Pol1-Pol1-Pol1-Neg-Neg-Pos<br>H1-H1-H1-Neg-Neg-Pos<br>Pol2-Pol2-Pol2-Pos-Pos-Neg<br>Pol2-Pol2-Pol2-Neg-Neg-Pos<br>Pos-Pos-Neg-H1-H1-H1<br>Pos-Pos-Neg-Pol1-Pol1-Pol1 | Pos-Pos-Neg-Pol2-Pol2-Pol2<br>Pos-Pos-Neg-Pos-Pos-Neg<br>Pos-Pos-Neg-Neg-Neg-Pos<br>Neg-Neg-Pos-H1-H1-H1<br>Neg-Neg-Pos-Pol1-Pol1-Pol1<br>Neg-Neg-Pos-Pol2-Pol2-Pol2<br>Neg-Neg-Pos-Pos-Pos-Neg<br>Neg-Neg-Pos-Neg-Neg-Pos | Pos-Pos-Neg-Neg-Neg-Pos<br>Pos-Pos-Neg-Pos-Pos-Neg<br>Pos-Pos-Neg-Neg-Pos-Neg<br>Neg-Neg-Pos-H1-H1-H1<br>Neg-Neg-Pos-Pol1-Pol1-Pol1<br>Neg-Neg-Pos-Pol2-Pol2-Pol2<br>Neg-Neg-Pos-Pos-Pos-Neg<br>Neg-Neg-Pos-Neg-Neg-Pos | Pos-Pos-Neg-Neg-Neg-Pos<br>Neg-Neg-Pos-Pos-Pos-Neg                                                                                                                                                                   | Pol1-Neg-Pos-Pos-Pos-Neg<br>Pos-Pos-Neg-Pol1-Neg-Pos<br>Pos-Pos-Neg-Neg-Pol1-Pos<br>Pos-Pos-Neg-Neg-Neg-Pos<br>Neg-Pol1-Pos-Pos-Pos-Neg<br>Neg-Neg-Pos-Pos-Pos-Neg                                                                                                                                                                                                                                                                                                                                                                                                                                                                     |                                                                                                                                                                                                                                                                                                                                                                                                                                                                                                                                                                                                                |

**TABLE S2.** Answers for all systems studied in the default MR model.

| s=2                  |                                 |                                              |                                                       | s=3                  |                                              |                                                                                                                                                                                                                                                                                                                                    | s=3 (symmetric)                                                                                                                                                      |
|----------------------|---------------------------------|----------------------------------------------|-------------------------------------------------------|----------------------|----------------------------------------------|------------------------------------------------------------------------------------------------------------------------------------------------------------------------------------------------------------------------------------------------------------------------------------------------------------------------------------|----------------------------------------------------------------------------------------------------------------------------------------------------------------------|
| $E_{th}=95\%E_{max}$ | $E_{th}=85\%E_{max}$            | $E_{th}=80\%E_{max}$                         | $E_{th}=70\%E_{max}$                                  | $E_{th}=80\%E_{max}$ | $E_{th}=70\%E_{max}$                         | $E_{th}=50\%E_{max}$                                                                                                                                                                                                                                                                                                               | $E_{th}=50\%E_{max}$                                                                                                                                                 |
| Seq(2 – 1)           |                                 |                                              |                                                       | Seq(3 – 2 – 1)       |                                              |                                                                                                                                                                                                                                                                                                                                    |                                                                                                                                                                      |
| Pos-Neg<br>Neg-Pos   | Pol1-Pol1<br>Pos-Neg<br>Neg-Pos | Pol1-Pol1<br>Pol2-Pol2<br>Pos-Neg<br>Neg-Pos | H1-H1<br>Pol1-Pol1<br>Pol2-Pol2<br>Pos-Neg<br>Neg-Pos | Pol1-Pol1-Pol1       | H1-H1-H1<br>Pol1-Pol1-Pol1<br>Pol2-Pol2-Pol2 | H1-H1-H1<br>H1-H1-H2<br>Pos-Neg-Pol1<br>Pos-Neg-Pol1<br>Pos-Neg-Neg<br>Pos-Neg-X2<br>Neg-Pos-Pol1<br>Neg-Pos-Neg<br>Neg-Pos-X2<br>Pol1-Pol1-Pol1<br>Pol1-Pol1-Pol2<br>Pol1-Pol1-Pol2<br>Pol1-Pol1-Pos<br>Pol1-Pol1-Neg<br>Pol1-Pol2-Pol1<br>Pol1-Pol2-Pol2<br>Pol2-Pol1-Pol1<br>Pol2-Pol1-Pol2<br>Pol2-Pol2-Pol1<br>Pol2-Pol2-Pol2 | H1-H1-H1<br>H2-H2-H2<br>Pol1-Pol1-Pol1<br>Pol1-Pol1-Pol2<br>Pol1-Pol2-Pol1<br>Pol1-Pol2-Pol2<br>Pol2-Pol1-Pol1<br>Pol2-Pol1-Pol2<br>Pol2-Pol2-Pol1<br>Pol2-Pol2-Pol2 |

**TABLE S3.** Answers for all systems studied in the MR-MP model.

| s=2 (MP)             |                                 |                                              |                                                       | s=3 (MP)                         |                                              |
|----------------------|---------------------------------|----------------------------------------------|-------------------------------------------------------|----------------------------------|----------------------------------------------|
| $E_{th}=95\%E_{max}$ | $E_{th}=85\%E_{max}$            | $E_{th}=80\%E_{max}$                         | $E_{th}=70\%E_{max}$                                  | $E_{th}=80\%E_{max}$             | $E_{th}=70\%E_{max}$                         |
| Seq(2 – 1)           |                                 |                                              |                                                       | Seq(3 – 2 – 1)                   |                                              |
| Pos-Neg<br>Neg-Pos   | Pol1-Pol1<br>Pos-Neg<br>Neg-Pos | Pol1-Pol1<br>Pol2-Pol2<br>Pos-Neg<br>Neg-Pos | H1-H1<br>Pol1-Pol1<br>Pol2-Pol2<br>Pos-Neg<br>Neg-Pos | Pol1-Pol1-Pol1<br>Pol2-Pol2-Pol2 | H1-H1-H1<br>Pol1-Pol1-Pol1<br>Pol2-Pol2-Pol2 |
