# Supplementary material for: Gate-based quantum computing for protein design
Source: PubMed Central journal article supplement (PMC10124842; doi:10.1371/journal.pcbi.1011033), 2023-04-12
Supplement: pcbi.1011033.s006.pdf [file pcbi.1011033.s006.pdf]

## S6. IMPLEMENTING ENERGIES IN THE CIRCUIT

In this part, we show parts of a circuit where some pair-wise energies are implemented using quantum gates (Fig. S7). Here, we have two interacting residues (Fig. S7-A), with the energy table described in Fig. S7-B. Since we have two designable sites, we require  $n = 6$  qubits, where each residue uses 3 qubits as shown in Fig. S7-C. In the circuit shown in Fig. S7-C, parts of the energy table are implemented through *multi-control-not gates*, specifically *6-control-1-NOT* gates.

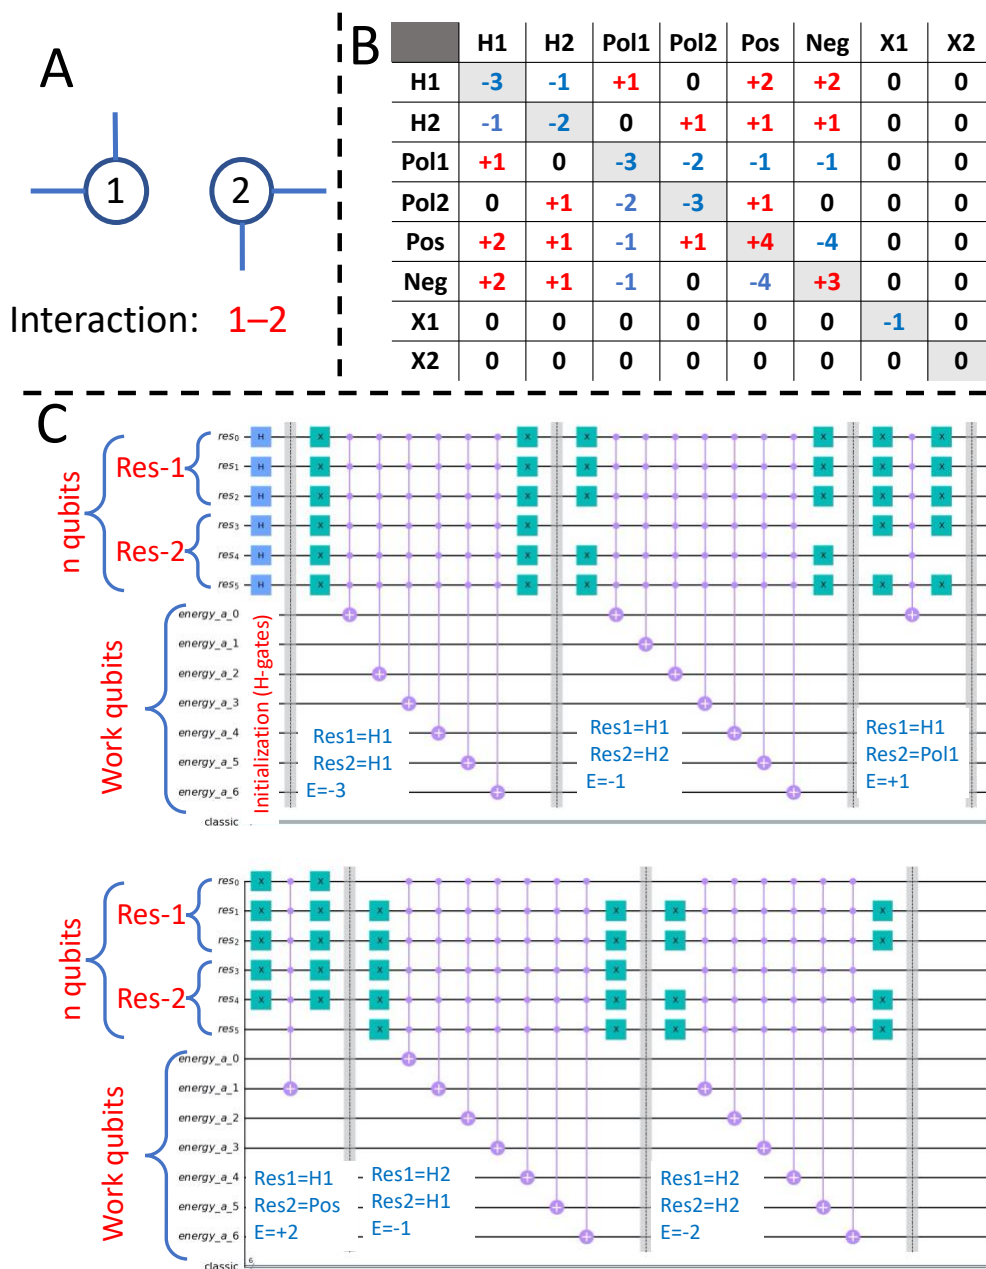

**FIG. S7.** A) representation of two interacting residues. B) energy table used in our study. C) Circuit representation of the initialization step and implementation of some of the pair-wise energies in the circuit, with  $g=3$ ,  $n=6$  and  $m=7$ .
